# Supplementary figures and images for: The Nutritional Content of Rescued Food Conveyed by a Food Aid Organization
Source: MDPI journal article supplement (doi:10.3390/ijerph182212212), 2021-11-20

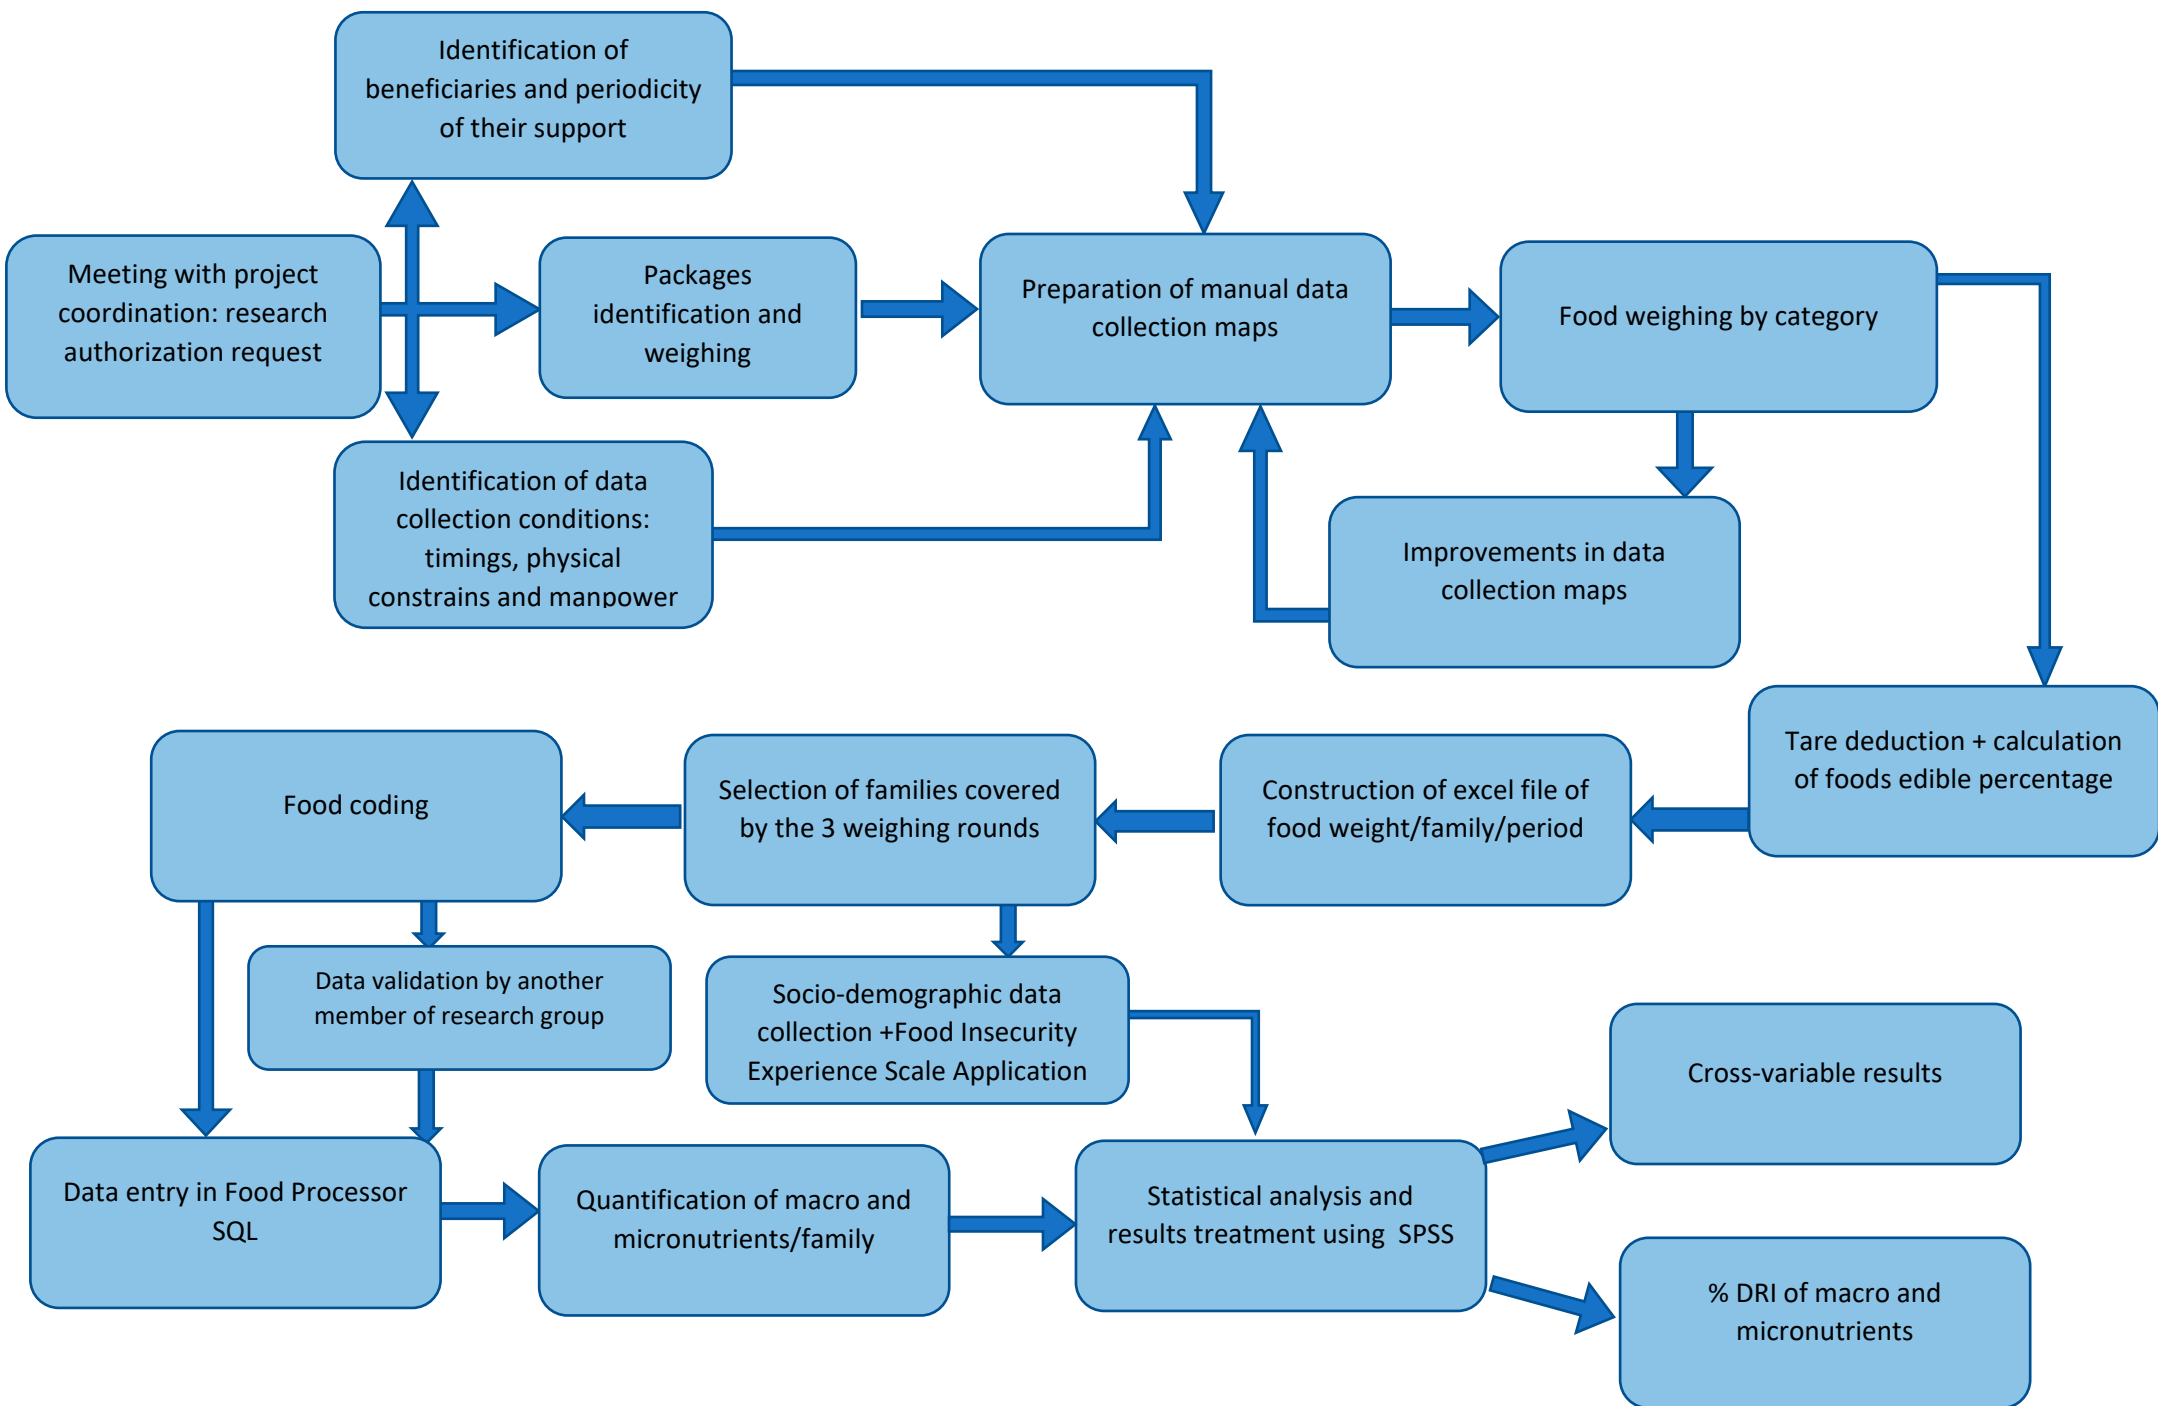

Supplement: s1 [file s1]
